# Supplementary material for: A C20-based 3D carbon allotrope with high thermal conductivity
Source: Royal Society of Chemistry journal article supplement (doi:10.1039/c9cp02202c), 2019-06-04
Supplement: c9cp02202c1.pdf [file c9cp02202c1.pdf]

Supplementary Information

**A C<sub>20</sub>-based 3D carbon allotrope with high thermal conductivity**

Yupeng Shen,<sup>a</sup> Fancy Qian Wang,<sup>a</sup> Jie Liu,<sup>a</sup> and Qian Wang<sup>\*a</sup>

<sup>a</sup>Center for Applied Physics and Technology, Department of Materials Science and Engineering, HEDPS, BKL-MEMD, College of Engineering, Peking University, Beijing 100871, China.

\*Corresponding author. Email: qianwang2@pku.edu.cn

1. Atomic Wyckoff positions of optimized HSP3-C<sub>34</sub>

Table S1. Atomic Wyckoff positions of HSP3-C<sub>34</sub>

| Wyckoff positions | <i>x</i> | <i>y</i> | <i>z</i> |
|-------------------|----------|----------|----------|
| 12o               | 0.79044  | 0.20956  | 0.72560  |
| 6m                | 0.13091  | 0.86909  | 0.50000  |
| 4h                | 0.66667  | 0.33333  | 0.63712  |
| 12n               | 0.61404  | 0.00000  | 0.86032  |
